# Supplementary material for: 3D‐e‐Chem: Structural Cheminformatics Workflows for Computer‐Aided Drug Discovery
Source: PubMed Central journal article supplement (PMC5900740; doi:10.1002/cmdc.201700754), 2018-02-14
Supplement: CMDC-13-614-s001.pdf [file CMDC-13-614-s001.pdf]

## Supporting Information

### **3D-e-Chem: Structural Cheminformatics Workflows for Computer-Aided Drug Discovery**

Albert J. Kooistra<sup>+, [a, b]</sup> Márton Vass<sup>+, [b]</sup> Ross McGuire,<sup>[a, c]</sup> Rob Leurs,<sup>[b]</sup> Iwan J. P. de Esch,<sup>[b]</sup>  
Gert Vriend,<sup>[a]</sup> Stefan Verhoeven,<sup>\*, [d]</sup> and Chris de Graaf<sup>\*, [b]</sup>

cmdc\_201700754\_sm\_miscellaneous\_information.pdf

**Table S1.** Structural cheminformatics tools and databases

| Method                                              | Type                          | API <sup>[a]</sup>           | Open source/access    | Dependencies <sup>[b]</sup> | Application <sup>[c]</sup>                                                                                                                             |
|-----------------------------------------------------|-------------------------------|------------------------------|-----------------------|-----------------------------|--------------------------------------------------------------------------------------------------------------------------------------------------------|
| PLANTS <sup>[1]</sup>                               | Executable                    |                              | Free academic license |                             | Ligand binding mode prediction (Fig. 3)                                                                                                                |
| KLIFS <sup>[2]</sup>                                | Web application + KNIME nodes | Swagger web service          | Apache 2.0 license    |                             | (Fig. 2, 3, 6)                                                                                                                                         |
| GPCRdb <sup>[3]</sup>                               | Web application + KNIME nodes | Swagger web service          | Apache 2.0 license    | Django, PostgreSQL          | (Fig. 4, 5, 6)                                                                                                                                         |
| PP_GPCR (SEA <sup>[4]</sup> /OCEAN <sup>[5]</sup> ) | Workflow                      |                              |                       |                             | Ligand repurposing (Fig. 4)                                                                                                                            |
| Silicos-it tools                                    | Executables                   |                              | GNU LGPLv3            | OpenBabel 2.0               | (Fig. 5)                                                                                                                                               |
| ss-TEA <sup>[6]</sup>                               | KNIME node                    |                              | Apache 2.0 license    | -                           | Binding site identification (Fig. 5)                                                                                                                   |
| Molviewer                                           | KNIME nodes                   | Swagger web service          | Apache 2.0 license    | NGL                         | Visualize (docked) ligands in a protein (Fig. 4)<br>Visualize (aligned) ligands (Fig. 6)<br>Visualize (aligned) pharmacophores and structures (Fig. 6) |
| KNIME-pharmacophore                                 | KNIME nodes                   |                              | Apache 2.0 license    | EJML                        | (Fig. 5)                                                                                                                                               |
| KRIPODB <sup>[7]</sup>                              | Executable + KNIME nodes      | Python + Swagger web service | Apache 2.0 license    | RDKit, PyTables, SQLite     | Off-target/polypharmacology prediction (Fig. 5) and identification of bioisosteres.                                                                    |

[a] Application Programming Interface; [b] Software and/or database dependencies; [c] Figures showing the application described in the current work is provided between brackets.

## References:

- [1] aO. Korb, T. Stützle, T. E. Exner, *Proc. IEEE Swarm Intell. Symp.* **2007**, 1, 115-134; bO. Korb, T. Stützle, T. E. Exner, *J. Chem. Inf. Model.* **2009**, 49, 84-96.
- [2] aO. P. J. van Linden, A. J. Kooistra, R. Leurs, I. J. P. de Esch, C. de Graaf, *Journal of medicinal chemistry* **2013**, 57(2), 249-277; bA. J. Kooistra, G. K. Kanev, O. P. van Linden, R. Leurs, I. J. P. de Esch, C. de Graaf, *Nucleic Acids Res* **2016**, 44(D1), D365-371.
- [3] V. Isberg, S. Mordalski, C. Munk, K. Rataj, K. Harpsoe, A. S. Hauser, B. Vroling, A. J. Bojarski, G. Vriend, D. E. Gloriam, *Nucleic Acids Res* **2017**, 45(5), 2936.
- [4] M. J. Keiser, B. L. Roth, B. N. Armbruster, P. Ernsberger, J. J. Irwin, B. K. Shoichet, *Nat Biotechnol* **2007**, 25(2), 197-206.
- [5] P. Czodrowski, W. G. Bolick, *J Chem Inf Model* **2016**, 56(10), 2013-2023.
- [6] M. P. Sanders, W. W. Fleuren, S. Verhoeven, S. van den Beld, W. Alkema, J. de Vlieg, J. P. Klomp, *BMC Bioinformatics* **2011**, 12, 332.
- [7] aT. Ritschel, T. J. Schirris, F. G. Russel, *J Cheminform* **2014**, 6(Suppl 1), O26; bD. J. Wood, J. de Vlieg, M. Wagener, T. Ritschel, *J Chem Inf Model* **2012**, 52(8), 2031-2043.
